# Supplementary material
Source: publisher figshare collection journal article supplement (https://gsapubs.figshare.com/ndownloader/files/22409337)
Supplement: Supplementary file 1 [file 22409337]

Cyr, A.J., Miller, D.M., and Mahan, S. A., 2015, Paleodischarge of the Mojave River, southwestern United States, investigated with single-pebble measurements of 10Be: Geosphere, v. 11, doi:10.1130/GES01134.1.

http://dx.doi.org/10.1130/GES01134.S1

| SUPPLEMENTAL TABLE 1. PHYSICAL CHARACTERISTICS OF PEBBLES ANALYZED FOR 10BE | | | | | | | | |
| --- | --- | --- | --- | --- | --- | --- | --- | --- |
| Sample name | Mass | Volume* | Density | Pebble axes† | | | Roundness§ | Sphericity# |
|  |  |  |  | a | b | c |  |  |
|  | (g) | (cm3) | (g/cm3) | (mm) | (mm) | (mm) |  |  |
| MRT-2a | 168.45 | 73 | 2.31 | 70.1 | 50.6 | 34.5 | 0.5 | 0.378 |
| MRT-2b | 191.35 | 79 | 2.42 | 79.1 | 47.4 | 43.6 | 0.8 | 0.344 |
| MRT-2d | 249.80 | 92 | 2.72 | 87.9 | 44.5 | 37.1 | 0.9 | 0.326 |
| MRT-2e | 140.10 | 57 | 2.46 | 78.9 | 48.4 | 25.9 | 0.7 | 0.309 |
| MRT-2f | 157.15 | 62 | 2.53 | 69.9 | 44.3 | 41.1 | 0.9 | 0.359 |
| MRT-2i | 122.35 | 56 | 2.18 | 62.2 | 50.8 | 31.9 | 0.8 | 0.390 |
| MRT-2j | 321.00 | 135 | 2.38 | 84.6 | 67.7 | 40.9 | 0.4 | 0.384 |
| MRT-2k | 180.55 | 72 | 2.51 | 80.9 | 46.9 | 46.5 | 0.3 | 0.326 |
| MRT-2n | 269.25 | 111 | 2.43 | 88.9 | 63.2 | 23.1 | 0.3 | 0.343 |
| *Determined by displacement. | | | | | | | | |
| †Measured in CAD software. | | | | | | | | |
| §Estimated from visual chart in Krumbein and Sloss (1956). | | | | | | | | |
| #Determined as the cube root of the particle volume divided by the volume of the circumscribing sphere. | | | | | | | | |
